# Supplementary material for: Reciprocal Relationships between Trajectories of Loneliness and Screen Media Use during Adolescence
Source: Springer Nature journal article supplement (doi:10.1007/s10826-021-02066-3), 2021-08-12
Supplement: MOESM1 [file 19567242]

**Supplementary Table 1.** Random Intercept Cross-Lagged Panel Data Model — Autoregressive

Parameters

|  | β | SE | p |
| --- | --- | --- | --- |
| Model 1: Friendship and Total Screen Time | | | |
| Friendship TIME1 🡪 Friendship TIME2 (1) | 0.072 | 0.037 | 0.053 |
| Friendship TIME2 🡪Friendship TIME3 (2) | **0.143** | **0.033** | **0.000** |
| Friendship TIME3 🡪 Friendship TIME4 (2) | **0.143** | **0.033** | **0.000** |
| Screen use TIME1 🡪 Screen use TIME2 (1) | **0.124** | **0.035** | **0.000** |
| Screen use TIME2 🡪 Screen use TIME3 (2) | **0.116** | **0.030** | **0.000** |
| Screen use TIME3 🡪 Screen use TIME4 (2) | **0.116** | **0.030** | **0.000** |
| Model 2: Friendship and Social Media | | | |
| Friendship TIME1 🡪 Friendship TIME2 (1) | 0.068 | 0.038 | 0.072 |
| Friendship TIME2 🡪 Friendship TIME3 (2) | **0.137** | **0.033** | **0.000** |
| Friendship TIME3 🡪 Friendship TIME4 (2) | **0.137** | **0.033** | **0.000** |
| Social media TIME1 🡪 Social media TIME2 (1) | **0.081** | **0.037** | **0.028** |
| Social media TIME2 🡪 Social media TIME3 (2) | 0.011 | 0.032 | 0.731 |
| Social media TIME3 🡪 Social media TIME4 (2) | 0.011 | 0.032 | 0.731 |
| Model 3: Friendship and Gaming | | | |
| Friendship TIME1 🡪 Friendship TIME2 (1) | **0.075** | **0.037** | **0.043** |
| Friendship TIME2 🡪 Friendship TIME3 (2) | **0.155** | **0.033** | **0.000** |
| Friendship TIME3 🡪 Friendship TIME4 (2) | **0.155** | **0.033** | **0.000** |
| Gaming TIME1 🡪 Gaming TIME2 (1) | **0.129** | **0.035** | **0.000** |
| Gaming TIME2 🡪 Gaming TIME3 (2) | **0.221** | **0.033** | **0.000** |
| Gaming TIME3 🡪 Gaming TIME4 (2) | **0.221** | **0.033** | **0.000** |
| Model 4: Friendship and Television/ Passive | | | |
| Friendship TIME1 🡪 Friendship TIME2 (1) | **0.079** | **0.037** | **0.034** |
| Friendship TIME2 🡪 Friendship TIME3 (2) | **0.156** | **0.033** | **0.000** |
| Friendship TIME3 🡪 Friendship TIME4 (2) | **0.156** | **0.033** | **0.000** |
| Television TIME1 🡪 Television TIME2 (1) | 0.037 | 0.038 | 0.327 |
| Television TIME2 🡪 Television TIME3 (2) | **0.172** | **0.030** | **0.000** |
| Television TIME3 🡪 Television TIME4 (2) | **0.172** | **0.030** | **0.000** |
| Model 5: Friendship and Web use | | | |
| Friendship TIME1 🡪 Friendship TIME2 (1) | **0.075** | **0.037** | **0.044** |
| Friendship TIME2 🡪 Friendship TIME3 (2) | **0.155** | **0.033** | **0.000** |
| Friendship TIME3 🡪 Friendship TIME4 (2) | **0.155** | **0.033** | **0.000** |
| Web use TIME1 🡪 Web use TIME2 (1) | 0.025 | 0.040 | 0.537 |
| Web use TIME2 🡪 Web use TIME3 (2) | **0.158** | **0.031** | **0.000** |
| Web use TIME3 🡪 Web use TIME4 (2) | **0.158** | **0.031** | **0.000** |
| Model 6: Isolation and Total Screen Time | | | |
| Isolation TIME1 🡪 Isolation TIME2 (γ1) | **0.210** | **0.039** | **0.000** |
| Isolation TIME2 🡪Isolation TIME3 (γ2) | **0.176** | **0.034** | **0.000** |
| Isolation TIME3 🡪 Isolation TIME4 (γ2) | **0.176** | **0.034** | **0.000** |
| Screen use TIME1 🡪 Screen use TIME2 (1) | **0.131** | **0.035** | **0.000** |
| Screen use TIME2 🡪 Screen use TIME3 (2) | **0.135** | **0.031** | **0.000** |
| Screen use TIME3 🡪 Screen use TIME4 (2) | **0.135** | **0.031** | **0.000** |
| Model 7: Isolation and Social Media | | | |
| Isolation TIME1 🡪 Isolation TIME2 (1) | **0.219** | **0.039** | **0.000** |
| Isolation TIME2 🡪 Isolation TIME3 (2) | **0.176** | **0.033** | **0.000** |
| Isolation TIME3 🡪 Isolation TIME4 (2) | **0.176** | **0.033** | **0.000** |
| Social media TIME1 🡪 Social media TIME2 (1) | **0.086** | **0.036** | **0.018** |
| Social media TIME2 🡪 Social media TIME3 (2) | 0.020 | 0.032 | 0.528 |
| Social media TIME3 🡪 Social media TIME4 (2) | 0.020 | 0.032 | 0.528 |
| Model 8: Isolation and Gaming | | | |
| Isolation TIME1 🡪 Isolation TIME2 (1) | **0.221** | **0.036** | **0.000** |
| Isolation TIME2 🡪 Isolation TIME3 (2) | **0.173** | **0.034** | **0.000** |
| Isolation TIME3 🡪 Isolation TIME4 (2) | **0.173** | **0.034** | **0.000** |
| Gaming TIME1 🡪 Gaming TIME2 (1) | **0.129** | **0.035** | **0.000** |
| Gaming TIME2 🡪 Gaming TIME3 (2) | **0.226** | **0.033** | **0.000** |
| Gaming TIME3 🡪 Gaming TIME4 (2) | **0.226** | **0.033** | **0.000** |
| Model 9: Isolation and Television/ Passive | | | |
| Isolation TIME1 🡪 Isolation TIME2 (1) | **0.211** | **0.039** | **0.000** |
| Isolation TIME2 🡪 Isolation TIME3 (2) | **0.185** | **0.033** | **0.000** |
| Isolation TIME3 🡪 Isolation TIME4 (2) | **0.185** | **0.033** | **0.000** |
| Television TIME1 🡪 Television TIME2 (1) | 0.046 | 0.038 | 0.218 |
| Television TIME2 🡪 Television TIME3 (2) | **0.184** | **0.030** | **0.000** |
| Television TIME3 🡪 Television TIME4 (2) | **0.184** | **0.030** | **0.000** |
| Model 10: Isolation and Web use | | | |
| Isolation TIME1 🡪 Isolation TIME2 (1) | **0.218** | **0.039** | **0.000** |
| Isolation TIME2 🡪 Isolation TIME3 (2) | **0.185** | **0.033** | **0.000** |
| Isolation TIME3 🡪 Isolation TIME4 (2) | **0.185** | **0.033** | **0.000** |
| Web use TIME1 🡪 Web use TIME2 (1) | 0.038 | 0.040 | 0.337 |
| Web use TIME2 🡪 Web use TIME3 (2) | **0.171** | **0.030** | **0.000** |
| Web use TIME3 🡪 Web use TIME4 (2) | **0.171** | **0.030** | **0.000** |

Note: results shown in bold type of *p* < 0.05

Change between Time 2 and Time 3 has been constrained to be equal to the change between Time 3 and Time 4.

**Supplementary Table 2.** Random Intercept Cross-Lagged Panel Data Model — Reciprocal effects estimates of Friendship/ Isolation and Screen Use by type - Standardised Model

|  | β | SE | p |
| --- | --- | --- | --- |
| Model 1: Friendship and Total Screen Time | | | |
| Friendship TIME1 🡪 Screen use TIME2 (γ1) | 0.018 | 0.038 | 0.628 |
| Friendship TIME2 🡪Screen use TIME3 (γ2) | **-0.118** | **0.030** | **0.000** |
| Friendship TIME3 🡪 Screen use TIME4 (γ2) | **-0.118** | **0.030** | **0.000** |
| Screen use TIME1 🡪 Friendship TIME2 (β1) | 0.012 | 0.037 | 0.749 |
| Screen use TIME2 🡪 Friendship TIME3 (β2) | **-0.106** | **0.029** | **0.000** |
| Screen use TIME3 🡪 Friendship TIME4 (β2) | **-0.106** | **0.029** | **0.000** |
| Model 2: Friendship and Social Media | | | |
| Friendship TIME1 🡪 Social media TIME2 (γ1) | 0.057 | 0.039 | 0.142 |
| Friendship TIME2 🡪 Social media TIME3 (γ2) | **-0.164** | **0.032** | **0.000** |
| Friendship TIME3 🡪 Social media TIME4 (γ2) | **-0.164** | **0.032** | **0.000** |
| Social media TIME1 🡪 Friendship TIME2 (β1) | -0.005 | 0.038 | 0.905 |
| Social media TIME2 🡪 Friendship TIME3 (β2) | **-0.129** | **0.030** | **0.000** |
| Social media TIME3 🡪 Friendship TIME4 (β2) | **-0.129** | **0.030** | **0.000** |
| Model 3: Friendship and Gaming | | | |
| Friendship TIME1 🡪 Gaming TIME2 (γ1) | -0.048 | 0.037 | 0.186 |
| Friendship TIME2 🡪 Gaming TIME3 (γ2) | **-0.056** | **0.030** | **0.063** |
| Friendship TIME3 🡪 Gaming TIME4 (γ2) | **-0.056** | **0.030** | **0.063** |
| Gaming TIME1 🡪 Friendship TIME2 (β1) | -0.011 | 0.036 | 0.771 |
| Gaming TIME2 🡪 Friendship TIME3 (β2) | -0.050 | 0.031 | 0.103 |
| Gaming TIME3 🡪 Friendship TIME4 (β2) | -0.050 | 0.031 | 0.103 |
| Model 4: Friendship and Television/ Passive | | | |
| Friendship TIME1 🡪 Television TIME2 (γ1) | 0.045 | 0.040 | 0.263 |
| Friendship TIME2 🡪 Television TIME3 (γ2) | **-0.068** | **0.028** | **0.017** |
| Friendship TIME3 🡪 Television TIME4 (γ2) | **-0.068** | **0.028** | **0.017** |
| Television TIME1 🡪 Friendship TIME2 (β1) | -0.033 | 0.037 | 0.370 |
| Television TIME2 🡪 Friendship TIME3 (β2) | **-0.075** | **0.029** | **0.009** |
| Television TIME3 🡪 Friendship TIME4 (β2) | **-0.075** | **0.029** | **0.009** |
| Model 5: Friendship and Web use | | | |
| Friendship TIME1 🡪 Web use TIME2 (γ1) | 0.051 | 0.041 | 0.210 |
| Friendship TIME2 🡪 Web use TIME3 (γ2) | **-0.820** | **0.030** | **0.006** |
| Friendship TIME3 🡪 Web use TIME4 (γ2) | **-0.820** | **0.030** | **0.006** |
| Web use TIME1 🡪 Friendship TIME2 (β1) | -0.039 | 0.039 | 0.324 |
| Web use TIME2 🡪 Friendship TIME3 (β2) | **-0.089** | **0.029** | **0.002** |
| Web use TIME3 🡪 Friendship TIME4 (β2) | **-0.089** | **0.029** | **0.002** |
| Model 6: Isolation and Total Screen Time | | | |
| Isolation TIME1 🡪 Screen use TIME2 (γ1) | 0.041 | 0.038 | 0.279 |
| Isolation TIME2 🡪Screen use TIME3 (γ2) | 0.036 | 0.029 | 0.218 |
| Isolation TIME3 🡪 Screen use TIME4 (γ2) | 0.036 | 0.029 | 0.218 |
| Screen use TIME1 🡪 Isolation TIME2 (β1) | 0.001 | 0.035 | 0.983 |
| Screen use TIME2 🡪 Isolation TIME3 (β2) | **0.056** | **0.028** | **0.047** |
| Screen use TIME3 🡪 Isolation TIME4 (β2) | **0.056** | **0.028** | **0.047** |
| Model 7: Isolation and Social Media | | | |
| Isolation TIME1 🡪 Social media TIME2 (γ1) | -0.007 | 0.038 | 0.844 |
| Isolation TIME2 🡪 Social media TIME3 (γ2) | 0.053 | 0.031 | 0.092 |
| Isolation TIME3 🡪 Social media TIME4 (γ2) | 0.053 | 0.031 | 0.092 |
| Social media TIME1 🡪 Isolation TIME2 (β1) | -0.048 | 0.035 | 0.179 |
| Social media TIME2 🡪 Isolation TIME3 (β2) | **0.109** | **0.027** | **0.000** |
| Social media TIME3 🡪 Isolation TIME4 (β2) | **0.109** | **0.027** | **0.000** |
| Model 8: Isolation and Gaming | | | |
| Isolation TIME1 🡪 Gaming TIME2 (γ1) | **0.073** | **0.036** | **0.044** |
| Isolation TIME2 🡪 Gaming TIME3 (γ2) | **0.065** | **0.028** | **0.023** |
| Isolation TIME3 🡪 Gaming TIME4 (γ2) | **0.065** | **0.028** | **0.023** |
| Gaming TIME1 🡪 Isolation TIME2 (β1) | -0.023 | 0.035 | 0.510 |
| Gaming TIME2 🡪 Isolation TIME3 (β2) | **0.107** | **0.029** | **0.000** |
| Gaming TIME3 🡪 Isolation TIME4 (β2) | **0.107** | **0.029** | **0.000** |
| Model 9: Isolation and Television/ Passive | | | |
| Isolation TIME1 🡪 Television TIME2 (γ1) | **-0.100** | **0.040** | **0.012** |
| Isolation TIME2 🡪 Television TIME3 (γ2) | 0.031 | 0.027 | 0.251 |
| Isolation TIME3 🡪 Television TIME4 (γ2) | 0.031 | 0.027 | 0.251 |
| Television TIME1 🡪 Isolation TIME2 (β1) | 0.012 | 0.035 | 0.730 |
| Television TIME2 🡪 Isolation TIME3 (β2) | **0.050** | **0.027** | **0.065** |
| Television TIME3 🡪 Isolation TIME4 (β2) | **0.050** | **0.027** | **0.065** |
| Model 10: Isolation and Web use | | | |
| Isolation TIME1 🡪 Web use TIME2 (γ1) | -0.008 | 0.041 | 0.836 |
| Isolation TIME2 🡪 Web use TIME3 (γ2) | 0.051 | 0.028 | 0.067 |
| Isolation TIME3 🡪 Web use TIME4 (γ2) | 0.051 | 0.028 | 0.067 |
| Web use TIME1 🡪 Isolation TIME2 (β1) | 0.050 | 0.037 | 0.888 |
| Web use TIME2 🡪 Isolation TIME3 (β2) | **0.069** | **0.028** | **0.015** |
| Web use TIME3 🡪 Isolation TIME4 (β2) | **0.069** | **0.028** | **0.015** |

Note: results shown in bold type of *p* < 0.05

Change between Time 2 and Time 3 has been constrained to be equal to the change between Time 3 and Time 4.

**Supplementary Table 3.** Random Intercept Cross-Lagged Panel Data Model — Autoregressive

Parameters for Standardised Model

|  | beta | SE | p |
| --- | --- | --- | --- |
| Model 1: Friendship and Total Screen Time | | | |
| Friendship TIME1 🡪 Friendship TIME2 (1) | 0.071 | 0.037 | 0.052 |
| Friendship TIME2 🡪Friendship TIME3 (2) | **0.141** | **0.033** | **0.000** |
| Friendship TIME3 🡪 Friendship TIME4 (2) | **0.141** | **0.033** | **0.000** |
| Screen use TIME1 🡪 Screen use TIME2 (1) | **0.123** | **0.034** | **0.000** |
| Screen use TIME2 🡪 Screen use TIME3 (2) | **0.115** | **0.030** | **0.000** |
| Screen use TIME3 🡪 Screen use TIME4 (2) | **0.115** | **0.030** | **0.000** |
| Model 2: Friendship and Social Media | | | |
| Friendship TIME1 🡪 Friendship TIME2 (1) | 0.067 | 0.037 | 0.071 |
| Friendship TIME2 🡪 Friendship TIME3 (2) | **0.136** | **0.032** | **0.000** |
| Friendship TIME3 🡪 Friendship TIME4 (2) | **0.136** | **0.032** | **0.000** |
| Social media TIME1 🡪 Social media TIME2 (1) | **0.081** | **0.037** | **0.027** |
| Social media TIME2 🡪 Social media TIME3 (2) | 0.011 | 0.031 | 0.731 |
| Social media TIME3 🡪 Social media TIME4 (2) | 0.011 | 0.031 | 0.731 |
| Model 3: Friendship and Gaming | | | |
| Friendship TIME1 🡪 Friendship TIME2 (1) | **0.075** | **0.037** | **0.042** |
| Friendship TIME2 🡪 Friendship TIME3 (2) | **0.154** | **0.033** | **0.000** |
| Friendship TIME3 🡪 Friendship TIME4 (2) | **0.154** | **0.033** | **0.000** |
| Gaming TIME1 🡪 Gaming TIME2 (1) | **0.128** | **0.034** | **0.000** |
| Gaming TIME2 🡪 Gaming TIME3 (2) | **0.219** | **0.032** | **0.000** |
| Gaming TIME3 🡪 Gaming TIME4 (2) | **0.219** | **0.032** | **0.000** |
| Model 4: Friendship and Television/ Passive | | | |
| Friendship TIME1 🡪 Friendship TIME2 (1) | **0.078** | **0.037** | **0.033** |
| Friendship TIME2 🡪 Friendship TIME3 (2) | **0.155** | **0.0323** | **0.000** |
| Friendship TIME3 🡪 Friendship TIME4 (2) | **0.155** | **0.0323** | **0.000** |
| Television TIME1 🡪 Television TIME2 (1) | 0.037 | 0.038 | 0.327 |
| Television TIME2 🡪 Television TIME3 (2) | **0.171** | **0.029** | **0.000** |
| Television TIME3 🡪 Television TIME4 (2) | **0.171** | **0.029** | **0.000** |
| Model 5: Friendship and Web use | | | |
| Friendship TIME1 🡪 Friendship TIME2 (1) | **0.075** | **0.037** | **0.043** |
| Friendship TIME2 🡪 Friendship TIME3 (2) | **0.153** | **0.033** | **0.000** |
| Friendship TIME3 🡪 Friendship TIME4 (2) | **0.153** | **0.033** | **0.000** |
| Web use TIME1 🡪 Web use TIME2 (1) | 0.025 | 0.040 | 0.537 |
| Web use TIME2 🡪 Web use TIME3 (2) | **0.157** | **0.029** | **0.000** |
| Web use TIME3 🡪 Web use TIME4 (2) | **0.157** | **0.029** | **0.000** |
| Model 6: Isolation and Total Screen Time | | | |
| Isolation TIME1 🡪 Isolation TIME2 (γ1) | **0.206** | **0.037** | **0.000** |
| Isolation TIME2 🡪Isolation TIME3 (γ2) | **0.176** | **0.033** | **0.000** |
| Isolation TIME3 🡪 Isolation TIME4 (γ2) | **0.176** | **0.033** | **0.000** |
| Screen use TIME1 🡪 Screen use TIME2 (1) | **0.130** | **0.034** | **0.000** |
| Screen use TIME2 🡪 Screen use TIME3 (2) | **0.135** | **0.031** | **0.000** |
| Screen use TIME3 🡪 Screen use TIME4 (2) | **0.135** | **0.031** | **0.000** |
| Model 7: Isolation and Social Media | | | |
| Isolation TIME1 🡪 Isolation TIME2 (1) | **0.214** | **0.036** | **0.000** |
| Isolation TIME2 🡪 Isolation TIME3 (2) | **0.176** | **0.033** | **0.000** |
| Isolation TIME3 🡪 Isolation TIME4 (2) | **0.176** | **0.033** | **0.000** |
| Social media TIME1 🡪 Social media TIME2 (1) | **0.085** | **0.036** | **0.017** |
| Social media TIME2 🡪 Social media TIME3 (2) | 0.020 | 0.032 | 0.528 |
| Social media TIME3 🡪 Social media TIME4 (2) | 0.020 | 0.032 | 0.528 |
| Model 8: Isolation and Gaming | | | |
| Isolation TIME1 🡪 Isolation TIME2 (1) | **0.216** | **0.037** | **0.000** |
| Isolation TIME2 🡪 Isolation TIME3 (2) | **0.173** | **0.033** | **0.000** |
| Isolation TIME3 🡪 Isolation TIME4 (2) | **0.173** | **0.033** | **0.000** |
| Gaming TIME1 🡪 Gaming TIME2 (1) | **0.128** | **0.034** | **0.000** |
| Gaming TIME2 🡪 Gaming TIME3 (2) | **0.224** | **0.032** | **0.000** |
| Gaming TIME3 🡪 Gaming TIME4 (2) | **0.224** | **0.032** | **0.000** |
| Model 9: Isolation and Television/ Passive | | | |
| Isolation TIME1 🡪 Isolation TIME2 (1) | **0.206** | **0.037** | **0.000** |
| Isolation TIME2 🡪 Isolation TIME3 (2) | **0.185** | **0.033** | **0.000** |
| Isolation TIME3 🡪 Isolation TIME4 (2) | **0.185** | **0.033** | **0.000** |
| Television TIME1 🡪 Television TIME2 (1) | 0.046 | 0.037 | 0.218 |
| Television TIME2 🡪 Television TIME3 (2) | **0.183** | **0.029** | **0.000** |
| Television TIME3 🡪 Television TIME4 (2) | **0.183** | **0.029** | **0.000** |
| Model 10: Isolation and Web use | | | |
| Isolation TIME1 🡪 Isolation TIME2 (1) | **0.213** | **0.037** | **0.000** |
| Isolation TIME2 🡪 Isolation TIME3 (2) | **0.185** | **0.033** | **0.000** |
| Isolation TIME3 🡪 Isolation TIME4 (2) | **0.185** | **0.033** | **0.000** |
| Web use TIME1 🡪 Web use TIME2 (1) | 0.038 | 0.04 | 0.336 |
| Web use TIME2 🡪 Web use TIME3 (2) | **0.169** | **0.029** | **0.000** |
| Web use TIME3 🡪 Web use TIME4 (2) | **0.169** | **0.029** | **0.000** |

Note: results shown in bold type of *p* < 0.05

Change between Time 2 and Time 3 has been constrained to be equal to the change between Time 3 and Time 4.
